# Supplementary material for: Two distinct membrane potential–dependent steps drive mitochondrial matrix protein translocation
Source: PubMed Central journal article supplement — J Cell Biol. 2017 Jan 2;216(1):83–92. doi: 10.1083/jcb.201607066 (PMC5223606; doi:10.1083/jcb.201607066), 2017-01-02
Supplement: JCB_201607066_sm.pdf [file JCB_201607066_sm.pdf]

Schendzielorz et al., <https://doi.org/10.1083/jcb.201607066>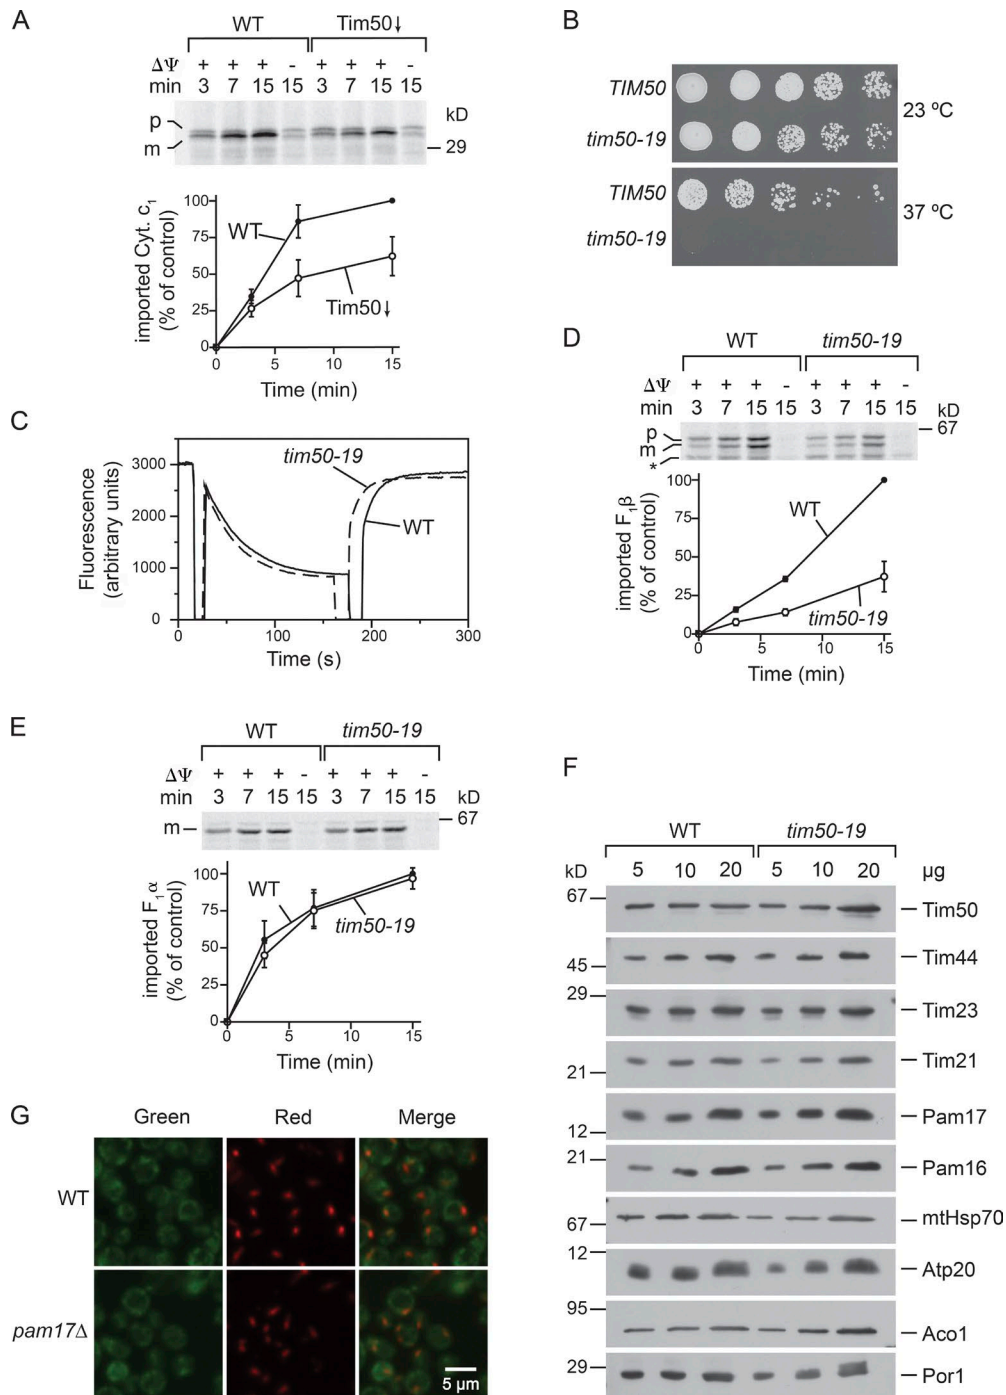

Figure S1. **Corresponding import experiments to Fig. 1 in *tim50-19* mitochondria.** (A)  $^{35}\text{S}$ -labeled precursor was imported as described in Fig. 1 for the indicated times. After stopping the import reaction with AVO, all samples were PK treated and analyzed by SDS-PAGE and digital autoradiography. (B) Serial dilutions of WT and *tim50-19* cells were spotted onto YPD medium and incubated at 23°C or 37°C. (C) Membrane potential of WT and *tim50-19* mitochondria was assessed as described in Figs. 1 and 2. (D and E) Isolated mitochondria were incubated for 15 min at a nonpermissive temperature before import of  $^{35}\text{S}$ -labeled precursors for the indicated times. After stopping import, all samples were PK treated and analyzed by SDS-PAGE and digital autoradiography. The asterisk indicates an unspecific degradation product. (A, D, and E) Results are presented as mean  $\pm$  SEM.  $n = 3$ . p, precursor; m, mature protein. (F) Steady-state Western blot analysis of mitochondria isolated from WT and *tim50-19*. (G) WT and *pam17Δ* cells were grown in YPG medium at 25°C overnight. To analyze mitochondrial membrane potential, cells were harvested and incubated with 20  $\mu\text{M}$  CCCP or the same volume of ethanol for 5 min at 25°C before the addition of 2  $\mu\text{M}$  JC-1 for 10 min at 25°C. JC-1 accumulates in a membrane potential-dependent manner in mitochondria and changes its emission spectrum from green to red light.

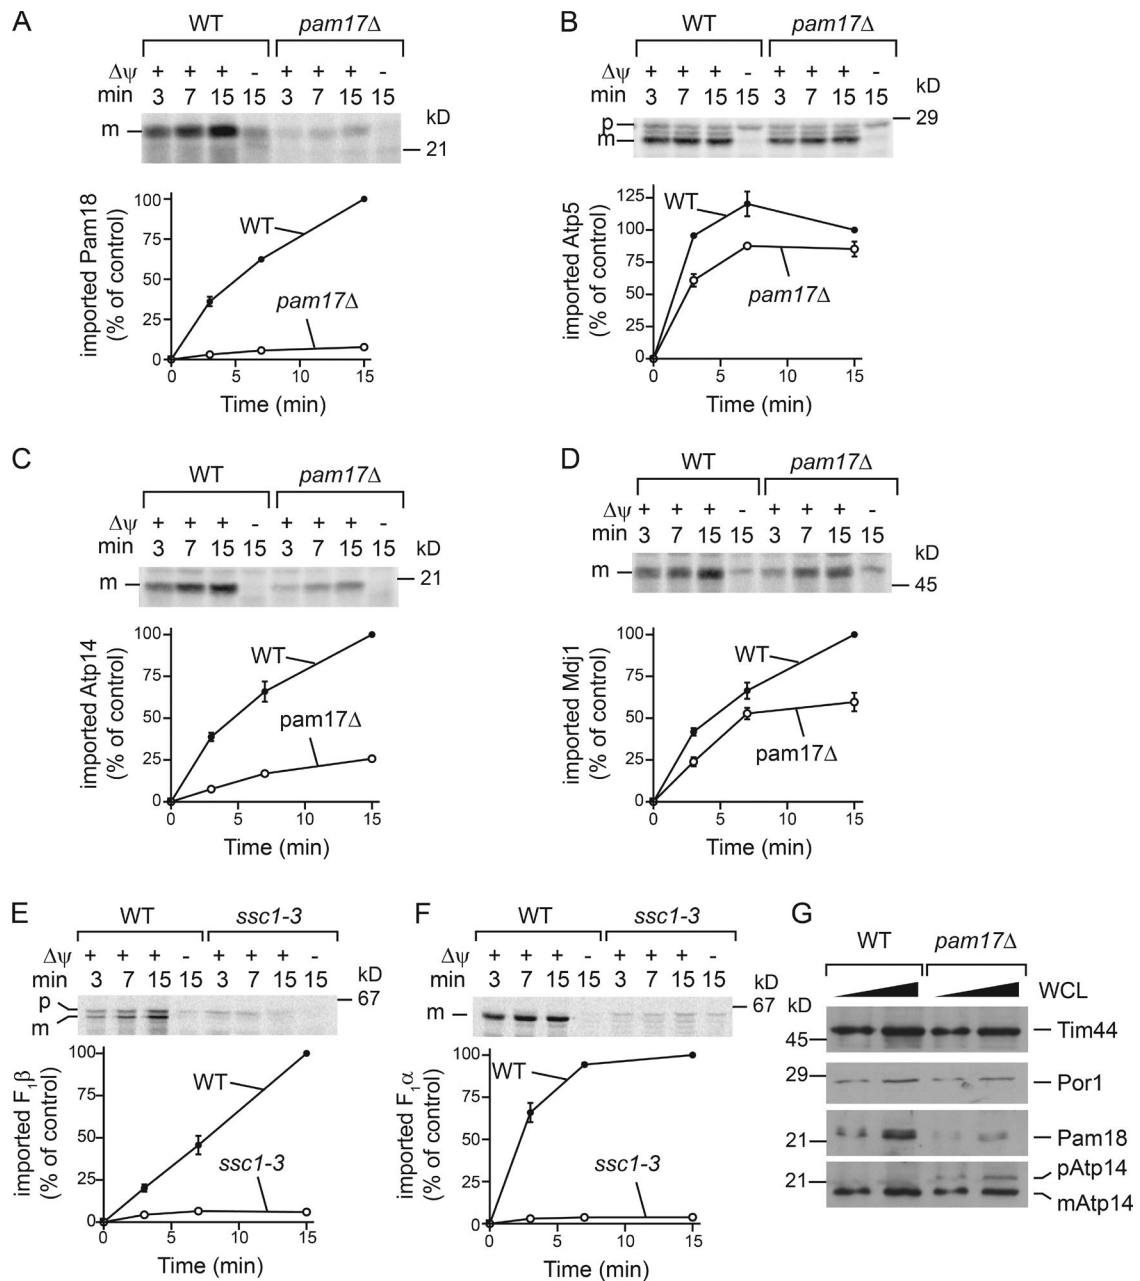

Figure S2. **Protein import is impaired in *pam17Δ* mitochondria and cells.** (A–D)  $^{35}\text{S}$ -labeled precursors were imported into isolated mitochondria as described in Fig. 1. After 15 min of import, reactions were stopped and import was analyzed by SDS-PAGE and autoradiography. Results are presented as mean  $\pm$  SEM.  $n = 3$ . (E and F) Mitochondria were incubated at 37°C for 15 min, and import was performed as described in A–D. p, precursor; m, mature protein. (G) To assess mitochondrial precursor accumulation in cells, WT and *pam17Δ* cells were grown overnight in YPD medium at 30°C. Cells were diluted in YPG medium and grown for 10 h. Subsequently, cells were harvested and cell lysates were analyzed by SDS-PAGE and Western blotting. WCL, whole cell lysate amount.

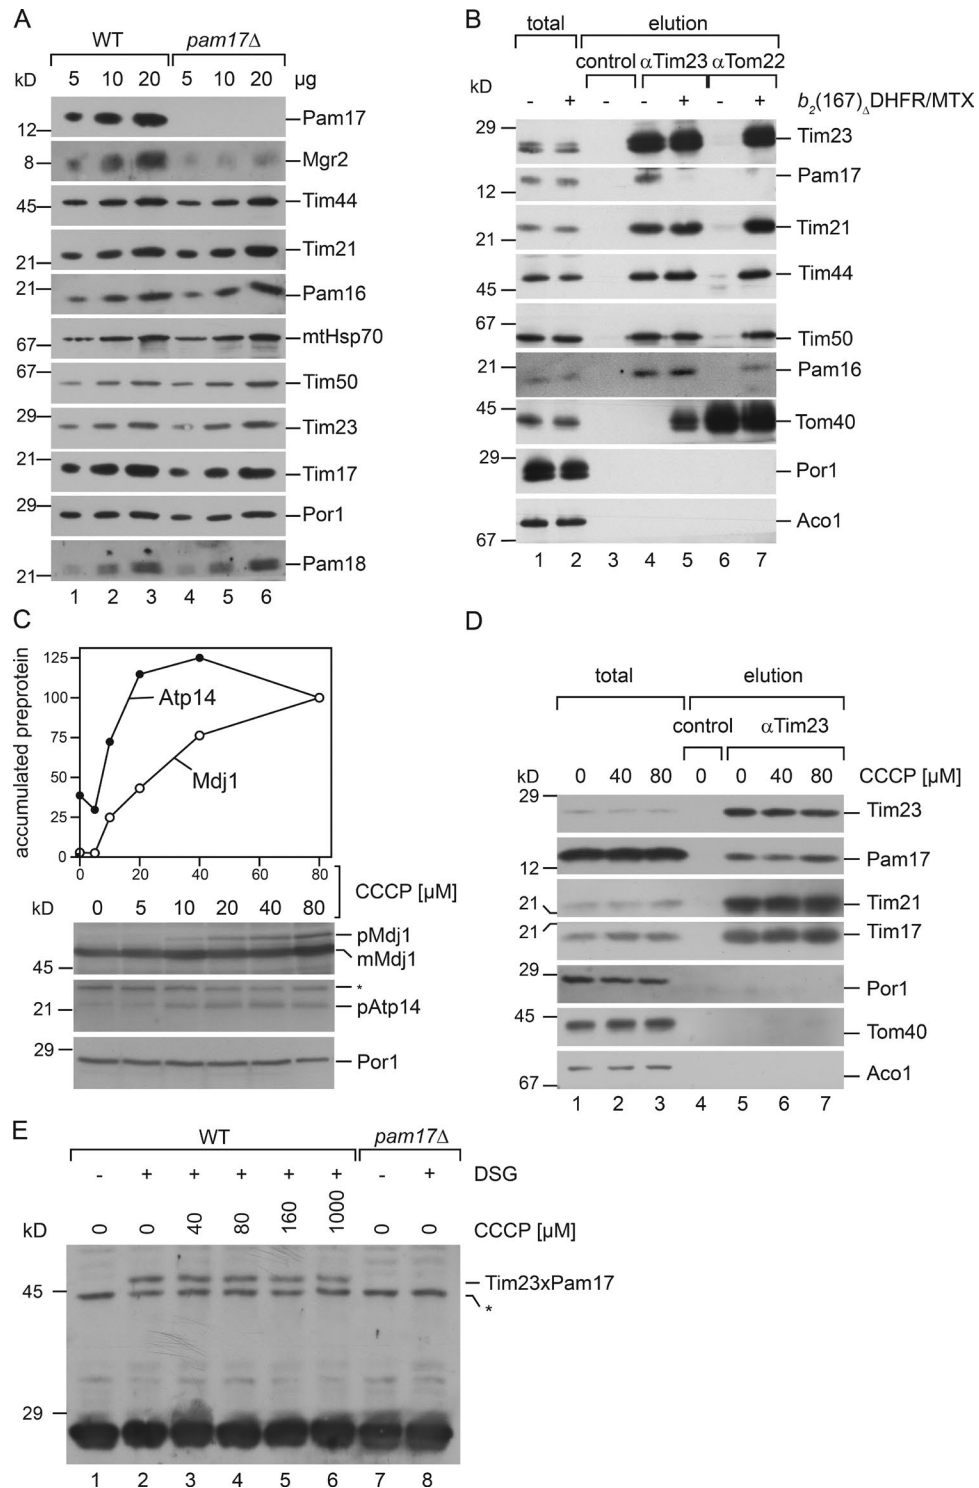

**Figure S3. Pam17 is not part of the active motor complex, and its association with TIM23 complex is not  $\Delta\psi$  dependent.** (A) Steady-state Western blot analysis of mitochondria isolated from WT and *pam17Δ*. (B) Mitochondria were incubated in import buffer with or without *b<sub>2</sub>(167)<sub>Δ</sub>*-DHFR and MTX for 15 min at 25°C. Afterward, mitochondria were solubilized in digitonin, and TIM23 and TOM complexes were immunoprecipitated using Tim23- and Tom22-specific antibodies, respectively. Total (5%) and elution fractions were analyzed by SDS-PAGE and Western blotting. (C) Cells were grown overnight at 30°C. After dilution, cells were grown for an additional 5 h in 2x YPAD medium at 30°C. Cell amounts were adjusted to  $OD_{600} = 1$ , and indicated amounts of CCCP were added for 30 min at 30°C. Cells were harvested and lysed before analysis by Western blotting. The amounts of Mdj1- and Atp14-accumulated precursors were quantified and plotted as percentages of accumulated precursors at 80 μM CCCP. The asterisk indicates a nonspecific cross-reaction band.  $n = 1$ . (D) Mitochondria were resuspended in solubilization buffer without digitonin and treated with the indicated amounts of CCCP for 5 min on ice. Afterward, digitonin was added and the TIM23 complex was isolated using Tim23-specific antibodies. Total (10%) and elution fractions were analyzed by SDS-PAGE and Western blotting. (E) Isolated mitochondria were incubated with indicated amounts of CCCP for 5 min before cross-linking with the amino group-specific cross-linker disuccinimidyl glutarate (DSG). After quenching of the cross-linker with glycine, mitochondria were reisolated and analyzed by SDS-PAGE and Western blotting. The asterisk indicates the nonspecific signal of the antibody.
